# Supplementary material for: Chemo- and enantioselective sulfoxidation of bis(ethylenedithio)-tetrathiafulvalene (BEDT-TTF) into chiral BEDT-TTF-sulfoxide
Source: Royal Society of Chemistry journal article supplement (doi:10.1039/b714245e), 2007-11-12
Supplement: b714245e.pdf [file b714245e.pdf]

# **Chemo- and Enantioselective Sulfoxidation of Bis(ethylenedithio)-Tetrathiafulvalene (BEDT-TTF) into Chiral BEDT-TTF-Sulfoxide**

Marcos Chas,<sup>a</sup> Margareth Lemarié,<sup>b</sup> Mihaela Gulea,<sup>b</sup> and Narcis Avarvari<sup>\*.a</sup>

**SUPPORTING INFORMATION**

## Experimental section

**General comments.** Dry  $\text{CH}_2\text{Cl}_2$  and  $\text{CH}_3\text{CN}$  were obtained by distillation over  $\text{P}_2\text{O}_5$  and THF was distilled over sodium and benzophenone. Nuclear magnetic resonance spectra were recorded on a Bruker Avance DRX 500 spectrometer operating at 500.04 MHz for  $^1\text{H}$ , 125.75 MHz for  $^{13}\text{C}$ . Chemical shifts are expressed in parts per million (ppm) downfield from external TMS. The following abbreviations are used: m, multiplet. EI MS spectra were recorded on Thermo Electron Corporation TRACE-DSQ apparatus, with direct introduction probe at 70 eV. Elemental analyses were performed by the "Service d'Analyse du CNRS" at Gif/Yvette, France.

**Synthesis of BEDT-TTF S-Oxide 2a-c:** To a BEDT-TTF (1.00 g, 2.60 mmol) solution in THF (700 ml), (+), (-) or (rac)-(8,8-Dichlorocamphorylsulfonyl)-oxaziridine **1** (0.70 g, 2.37 mmol) in THF (10 ml) was added. The resulting solution was stirred at room temperature for 12 hours. The solvent was then evaporated under reduced pressure and the solid residue chromatographed through silica gel with  $\text{CH}_2\text{Cl}_2$ , and then  $\text{CH}_2\text{Cl}_2/\text{AcOEt}$  20:1 as eluents to obtain the product as a yellow solid. Further purification may be achieved by recrystallization from hot toluene, affording 797 mg (84% yield) of the pure product. Single crystals suitable for X-ray diffraction were obtained by evaporation of a dilute solution of the product in  $\text{CH}_2\text{Cl}_2$  or toluene.  $^1\text{H}$  NMR ( $\text{CDCl}_3$ )  $\delta$  3.20-3.44 (m, 8H,  $\text{S}(\text{CH}_2)_2\text{S}$ );  $^{13}\text{C}$  NMR ( $\text{CDCl}_3$ )  $\delta$  28.7 ( $\text{CH}_2$ ), 29.6 ( $\text{CH}_2$ ), 29.7 ( $\text{CH}_2$ ), 30.7 ( $\text{CH}_2$ ); IR (KBr,  $\text{cm}^{-1}$ ) 1034 (SO); MS (EI)  $m/z$  400 ( $\text{M}^+$ ), 384 ( $\text{BEDT-TTF}^+$ ); Anal. Calc. for  $\text{C}_{10}\text{H}_8\text{O}_1\text{S}_8$ : C 29.98, H 2.01, O 3.99. Found: C 29.72, H 2.03, O 4.50%.

**Synthesis of the CT complex (BEDT-TTF-bis(sulfoxide))[TCNQF<sub>4</sub>] **3**:** To a solution of **2** (10 mg, 0.025 mmol) in  $\text{CH}_2\text{Cl}_2$  (15 ml), a solution of TCNQF<sub>4</sub> (6.9 mg, 0.025 mmol) in 5 ml of  $\text{CH}_2\text{Cl}_2$  was added. The resulting mixture was left standing at room temperature in an open flask and after solvent evaporation, black single crystals were obtained. IR (KBr,  $\text{cm}^{-1}$ ) 2192 (CN), 2165 (CN), 1583 (C=C TCNQF<sub>4</sub>), 1038 (SO); MS (EI)  $m/z$  416 ( $\text{BEDT-TTF}-(\text{SO})_2^+$ ), 384 ( $\text{BEDT-TTF}^+$ ); Anal. Calc. for  $\text{C}_{22}\text{H}_8\text{F}_4\text{N}_4\text{O}_2\text{S}_8$ : C 38.14, H 1.16, N 8.09. Found: C 38.82, H 1.25, N 7.76%.

**Chiral HPLC analyses:** The measurements have been performed with a Daicel Chiralpak column, AD-H 5  $\mu\text{m}$ , 4.6x250 mm, 1 mL/min, 90% MeCN, 10% *iso*-propanol, 20 °C. Retention times 13.5-15 min. (enantiomer *S*) and 25.2-27.5 min (enantiomer *R*).

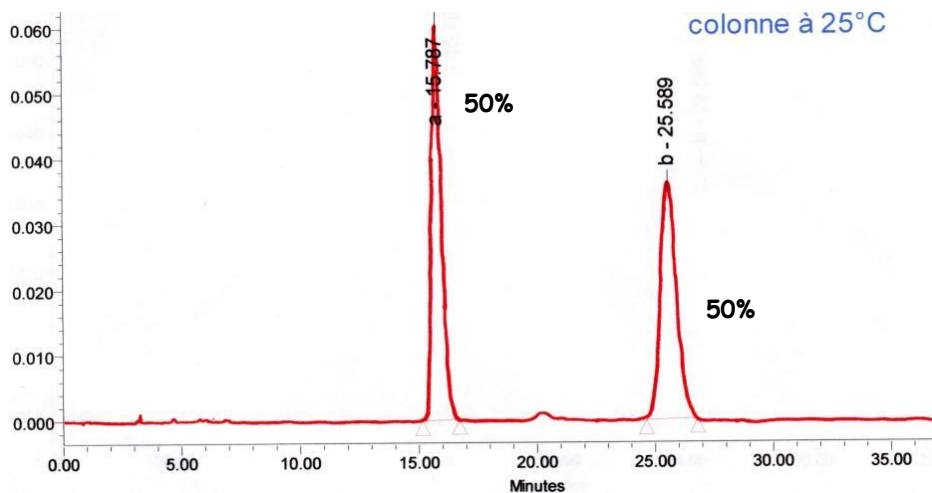

Fig. S1 Chiral HPLC chromatogram for **2c** (racemic).

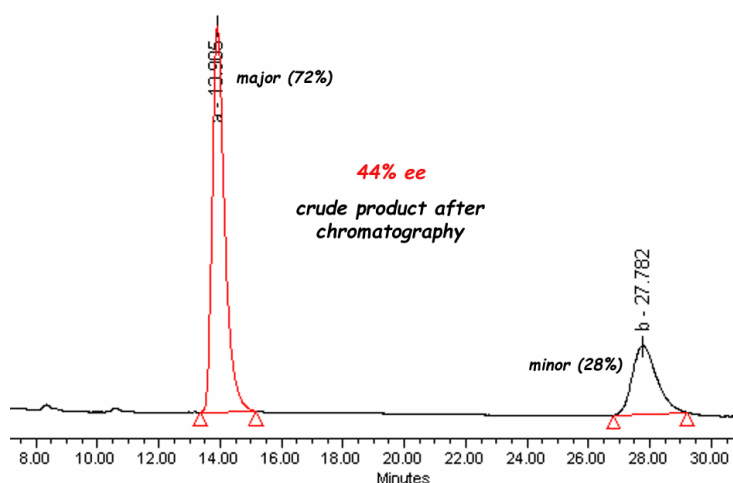

Fig. S2 Chiral HPLC chromatogram for **2a** (enantio-enriched). Solid after chromatography purification.

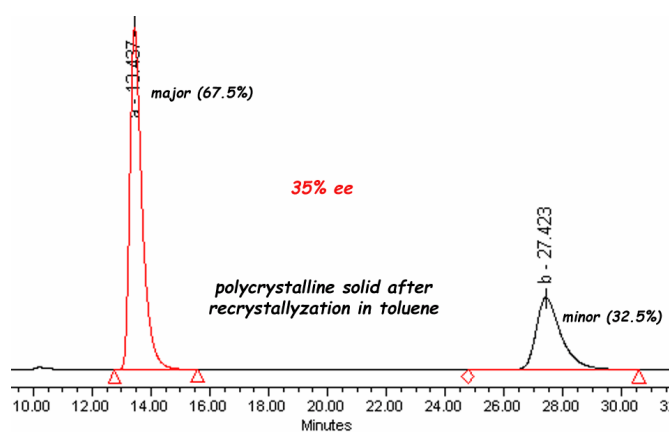

Fig. S3 Chiral HPLC chromatogram for **2a** (enantio-enriched). Solid after recrystallization in toluene.

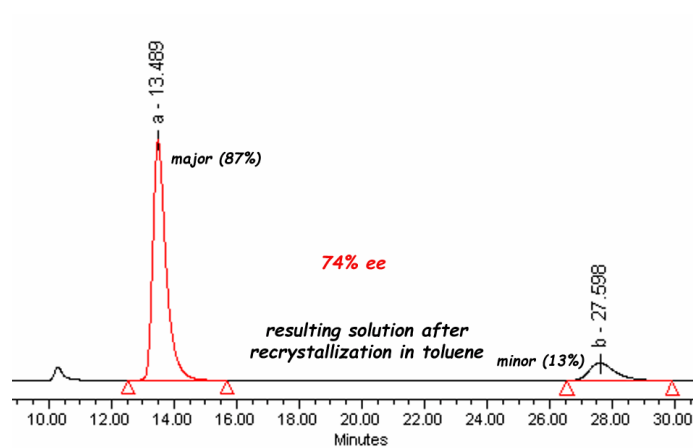

**Fig. S4** Chiral HPLC chromatogram for **2a** (enantio-enriched). Mother liquors after recrystallization in toluene.

**X-Ray Structure Determinations.** X-ray diffraction measurements were performed on a Bruker Kappa CCD diffractometer for, operating with a Mo-K $\alpha$  ( $\lambda = 0.71073 \text{ \AA}$ ) X-ray tube with a graphite monochromator. The structures were solved (SHELXS-97) by direct methods and refined (SHELXL-97) by full-matrix least-square procedures on  $F^2$ .<sup>1</sup> All non-H atoms were refined anisotropically, and hydrogen atoms were introduced at calculated positions (riding model), included in structure factor calculations but not refined.

**X-ray structure of 2.**

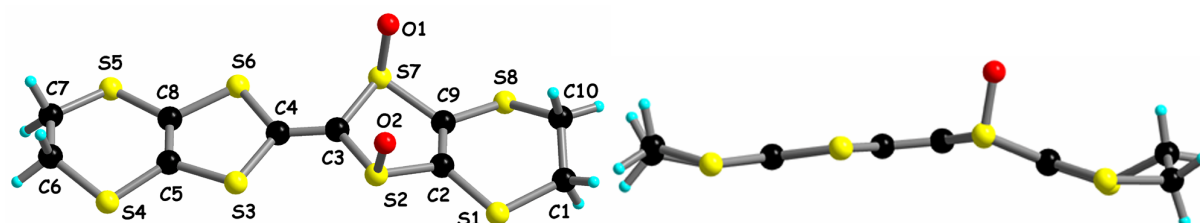

**Fig. S5** Molecular structure of **2** along with the numbering scheme (left). The site occupational factors (s.o.f.) have been refined to 0.8 for O1 and 0.2 for O2. Side view of the molecule (right).

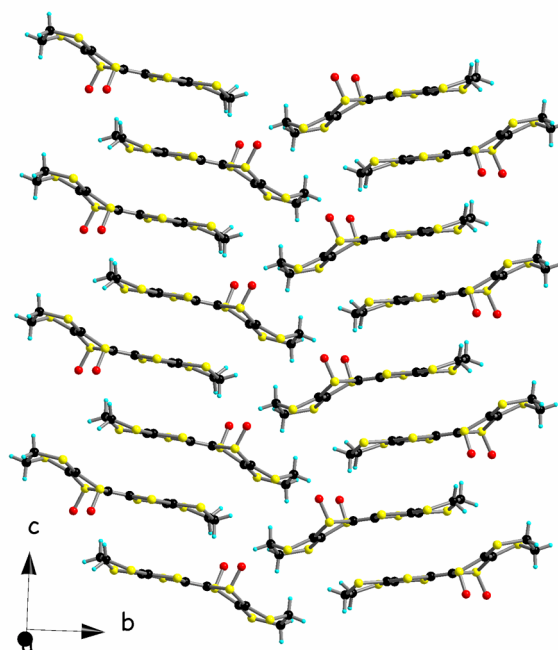

**Fig. S6** Packing diagram of **2** along the *a* axis.

**Bond Lengths ( $\text{\AA}$ )**

|                |                |                 |                |
|----------------|----------------|-----------------|----------------|
| S1 C2 1.736(4) | S1 C1 1.807(5) | S2 O2 1.445(15) | S2 C3 1.755(4) |
| S2 C2 1.763(4) | S3 C4 1.733(4) | S3 C5 1.745(4)  | S4 C6 1.716(6) |
| S4 C5 1.737(4) | S5 C7 1.703(6) | S5 C8 1.736(4)  | S6 C4 1.739(4) |

<sup>1</sup> G. M. Sheldrick, *Programs for the Refinement of Crystal Structures*, University of Göttingen, Göttingen, Germany, 1996.

|                |                 |                 |                |
|----------------|-----------------|-----------------|----------------|
| S6 C8 1.746(4) | S7 O1 1.492(4)  | S7 C3 1.765(4)  | S7 C9 1.776(4) |
| S8 C9 1.750(4) | S8 C10 1.804(5) | C1 C10 1.494(7) | C2 C9 1.342(6) |
| C3 C4 1.353(5) | C5 C8 1.340(6)  | C6 C7 1.373(8)  |                |

### Bond Angles (°)

|                    |                    |                    |                    |
|--------------------|--------------------|--------------------|--------------------|
| C2 S1 C1 104.7(2)  | O2 S2 C3 109.1(6)  | O2 S2 C2 105.8(6)  | C3 S2 C2 91.86(19) |
| C4 S3 C5 95.9(2)   | C6 S4 C5 102.7(3)  | C7 S5 C8 104.0(3)  | C4 S6 C8 95.68(19) |
| O1 S7 C3 109.3(2)  | O1 S7 C9 108.2(2)  | C3 S7 C9 90.97(19) | C9 S8 C10 98.1(2)  |
| C10 C1 S1 117.4(3) | C9 C2 S1 128.5(3)  | C9 C2 S2 117.4(3)  | S1 C2 S2 114.1(2)  |
| C4 C3 S2 122.6(3)  | C4 C3 S7 122.2(3)  | S2 C3 S7 115.2(2)  | C3 C4 S3 122.2(3)  |
| C3 C4 S6 123.3(3)  | S3 C4 S6 114.5(2)  | C8 C5 S4 126.5(3)  | C8 C5 S3 116.9(3)  |
| S4 C5 S3 116.6(3)  | C7 C6 S4 126.1(5)  | C6 C7 S5 127.0(5)  | C5 C8 S5 127.5(3)  |
| C5 C8 S6 116.9(3)  | S5 C8 S6 115.6(3)  | C2 C9 S8 125.4(3)  | C2 C9 S7 117.4(3)  |
| S8 C9 S7 116.9(2)  | C1 C10 S8 115.8(4) |                    |                    |

### X-ray structure of 3.

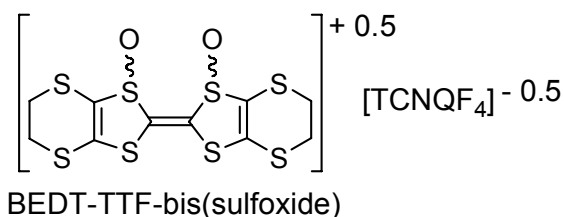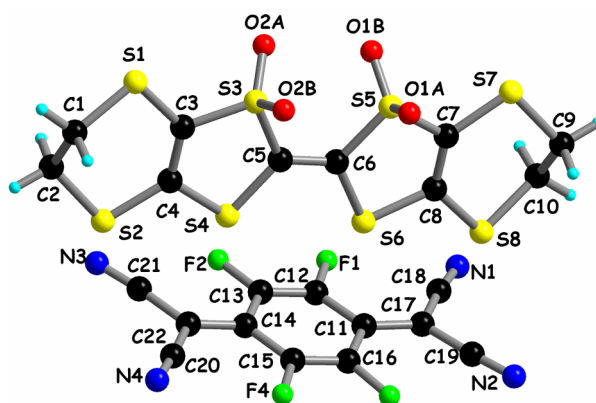

Fig. S7 Molecular structure of 3 along with the numbering scheme.

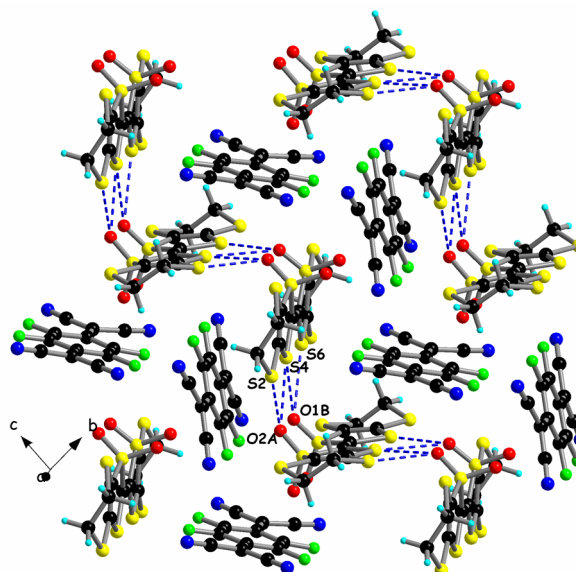

**Fig. S8** Packing diagram of **3** along the *a* axis. Intermolecular S $\cdots$ O distances ( $\text{\AA}$ ): O2A $\cdots$ S4 2.97, O2A $\cdots$ S2 3.04, O1B $\cdots$ S4 3.08, O1B $\cdots$ S6 3.26. Short O $\cdots$ C contacts of 2.72-2.90  $\text{\AA}$  are also observed between adjacent BEDT-TTF-SO and TCNQF<sub>4</sub> molecules.

Bond Lengths ( $\text{\AA}$ )

|                  |                  |                  |                  |
|------------------|------------------|------------------|------------------|
| S1 C3 1.761(5)   | S1 C1 1.780(7)   | S2 C4 1.745(5)   | S2 C2 1.785(5)   |
| S3 O2A 1.406(7)  | S3 O2B 1.455(8)  | S3 C3 1.728(5)   | S3 C5 1.746(4)   |
| S4 C4 1.734(4)   | S4 C5 1.740(4)   | S5 O1B 1.357(6)  | S5 O1A 1.479(5)  |
| S5 C7 1.739(4)   | S5 C6 1.750(4)   | S6 C6 1.754(4)   | S6 C8 1.768(5)   |
| S7 C7 1.741(4)   | S7 C9 1.780(5)   | S8 C8 1.745(4)   | S8 C10 1.801(6)  |
| C1 C2 1.504(9)   | C3 C4 1.358(6)   | C5 C6 1.346(5)   | C7 C8 1.339(6)   |
| C9 C10 1.469(8)  | F1 C12 1.329(5)  | F2 C13 1.322(5)  | F3 C16 1.334(5)  |
| F4 C15 1.332(5)  | N1 C18 1.136(6)  | N2 C19 1.137(6)  | N3 C21 1.141(6)  |
| N4 C22 1.123(6)  | C11 C17 1.388(6) | C11 C12 1.423(6) | C11 C16 1.432(6) |
| C12 C13 1.339(6) | C13 C14 1.440(6) | C14 C20 1.384(6) | C14 C15 1.421(6) |
| C15 C16 1.343(5) | C17 C19 1.425(7) | C17 C18 1.433(7) | C20 C22 1.404(7) |
| C20 C21 1.431(7) |                  |                  |                  |

### Powder X-ray diffraction.

Powder X-ray diffraction measurements were carried out on a D8 Brucker diffractometer using  $\text{CuK}\alpha_{1,2}$  radiation, equipped with the linear Vantec super speed detector. 45 minutes diffractograms were collected in the range  $4\text{-}30^\circ$  ( $2\theta$ ).

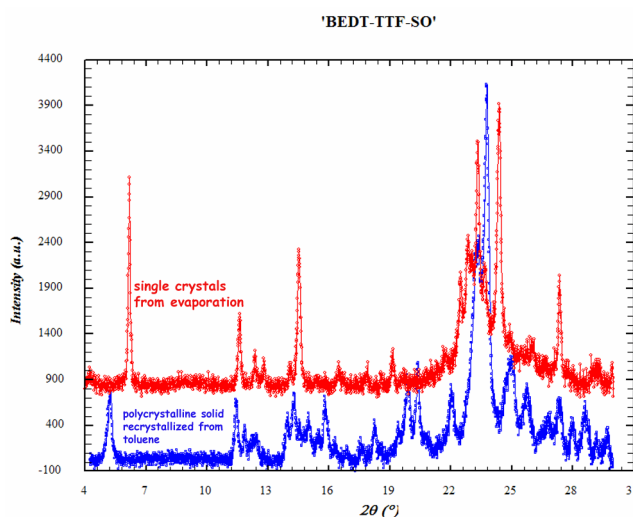

**Fig. S9** Combined powder X-ray diffractogram of **2**, emphasizing the differences between the single crystals obtained by evaporation and the polycrystalline solid resulted from recrystallization in toluene.



## Theoretical Calculations

The optimized geometries have been obtained with the Gaussian03<sup>2</sup> package at the DFT level of theory. The B3LYP functional<sup>3</sup> with the 6-31+G\* basis set has been used. Vibrations frequency calculations performed on the optimized structures at the same level of theory yielded only positive values.

### Theoretical calculations on BEDT-TTF-sulfoxide 2.

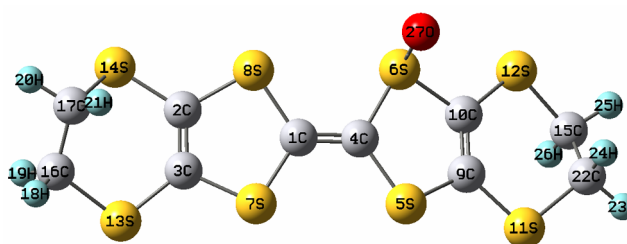

Fig. S10 Optimized geometry for 2.

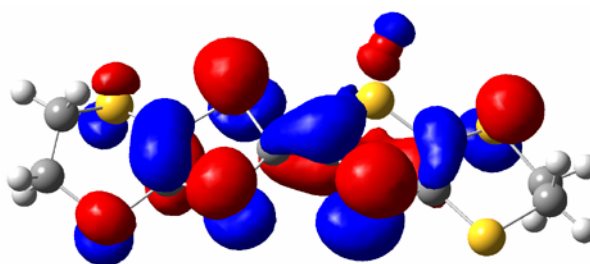

Fig. S11 HOMO of 2. E = -5.556 eV.

### Orientation for 2.

| Center Number | Atomic Number | Atomic Type | Coordinates (Angstroms) |           |           |
|---------------|---------------|-------------|-------------------------|-----------|-----------|
|               |               |             | X                       | Y         | Z         |
| 1             | 6             | 0           | 0.728450                | 0.037542  | 0.352336  |
| 2             | 6             | 0           | 3.174535                | -0.633183 | -0.270481 |
| 3             | 6             | 0           | 3.202157                | 0.715051  | -0.181831 |
| 4             | 6             | 0           | -0.625221               | 0.061674  | 0.433090  |
| 5             | 16            | 0           | -1.572909               | 1.525959  | 0.701510  |
| 6             | 16            | 0           | -1.577646               | -1.484928 | 0.297784  |
| 7             | 16            | 0           | 1.724115                | 1.507348  | 0.412875  |
| 8             | 16            | 0           | 1.688891                | -1.452527 | 0.257696  |

<sup>2</sup> J. A. Pople et al., *Gaussian03*, Revision B.03; Gaussian, Inc.: Wallingford CT, 2004.

<sup>3</sup> (a) C. Lee, W. Yang and R. G. Parr, *Phys. Rev. B*, 1988, **37**, 785; (b) A. D. Becke, *J. Chem. Phys.*, 1993, **98**, 5648.

|    |    |   |           |           |           |
|----|----|---|-----------|-----------|-----------|
| 9  | 6  | 0 | -3.073135 | 0.787557  | 0.094917  |
| 10 | 6  | 0 | -3.083640 | -0.545789 | -0.122894 |
| 11 | 16 | 0 | -4.395103 | 1.942598  | -0.124715 |
| 12 | 16 | 0 | -4.409493 | -1.582108 | -0.682973 |
| 13 | 16 | 0 | 4.546248  | 1.789144  | -0.566436 |
| 14 | 16 | 0 | 4.586658  | -1.613822 | -0.661526 |
| 15 | 6  | 0 | -5.662599 | -0.332419 | -1.165799 |
| 16 | 6  | 0 | 6.054494  | 0.746991  | -0.225442 |
| 17 | 6  | 0 | 5.786280  | -0.638175 | 0.344137  |
| 18 | 1  | 0 | 6.668473  | 1.320344  | 0.478233  |
| 19 | 1  | 0 | 6.586028  | 0.670386  | -1.176812 |
| 20 | 1  | 0 | 6.719490  | -1.211782 | 0.343787  |
| 21 | 1  | 0 | 5.408394  | -0.592346 | 1.369163  |
| 22 | 6  | 0 | -5.824805 | 0.793906  | -0.145275 |
| 23 | 1  | 0 | -6.675106 | 1.427895  | -0.419016 |
| 24 | 1  | 0 | -5.994662 | 0.399202  | 0.859817  |
| 25 | 1  | 0 | -6.593512 | -0.905416 | -1.240669 |
| 26 | 1  | 0 | -5.425970 | 0.071643  | -2.153531 |
| 27 | 8  | 0 | -1.775551 | -2.155682 | 1.639378  |

-----

|             |         |         |         |         |         |
|-------------|---------|---------|---------|---------|---------|
| Mode        | 1       | 2       | 3       | 4       | 5       |
| Symmetry    | A       | A       | A       | A       | A       |
| Frequencies | 18.9212 | 26.8293 | 34.7346 | 40.4526 | 51.4588 |

### Theoretical calculations on BEDT-TTF.

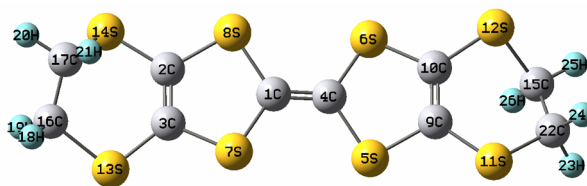

Fig. S12 Optimized geometry for BEDT-TTF.

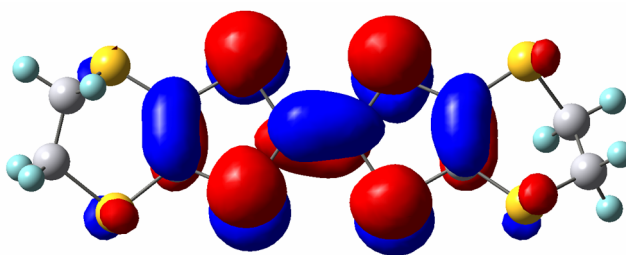

Fig. S13 HOMO of BEDT-TTF.  $E = -4.827$  eV.

### Orientation for BEDT-TTF.

| Center Number | Atomic Number | Atomic Type | Coordinates (Angstroms) |           |           |
|---------------|---------------|-------------|-------------------------|-----------|-----------|
|               |               |             | X                       | Y         | Z         |
| 1             | 6             | 0           | -0.671035               | 0.035051  | 0.074811  |
| 2             | 6             | 0           | -3.185787               | 0.703433  | -0.156796 |
| 3             | 6             | 0           | -3.187127               | -0.647700 | -0.152909 |
| 4             | 6             | 0           | 0.671174                | 0.035024  | -0.077642 |
| 5             | 16            | 0           | 1.643471                | -1.457173 | -0.212689 |
| 6             | 16            | 0           | 1.648445                | 1.522227  | -0.208715 |
| 7             | 16            | 0           | -1.643174               | -1.457242 | 0.209883  |
| 8             | 16            | 0           | -1.648181               | 1.522239  | 0.206265  |
| 9             | 6             | 0           | 3.186856                | -0.647677 | 0.152715  |
| 10            | 6             | 0           | 3.185509                | 0.703423  | 0.156792  |
| 11            | 16            | 0           | 4.561228                | -1.715237 | 0.443971  |
| 12            | 16            | 0           | 4.649073                | 1.675936  | 0.305339  |
| 13            | 16            | 0           | -4.561736               | -1.715494 | -0.441933 |
| 14            | 16            | 0           | -4.649441               | 1.676213  | -0.303458 |
| 15            | 6             | 0           | 5.697045                | 0.619748  | -0.784133 |
| 16            | 6             | 0           | -6.022882               | -0.732518 | 0.169557  |
| 17            | 6             | 0           | -5.696284               | 0.619627  | 0.786761  |
| 18            | 1             | 0           | -6.528845               | -1.361312 | 0.911060  |
| 19            | 1             | 0           | -6.680879               | -0.606348 | -0.693533 |
| 20            | 1             | 0           | -6.627222               | 1.174048  | 0.948319  |

|    |   |   |           |           |           |
|----|---|---|-----------|-----------|-----------|
| 21 | 1 | 0 | -5.183495 | 0.515095  | 1.746759  |
| 22 | 6 | 0 | 6.022962  | -0.732761 | -0.167319 |
| 23 | 1 | 0 | 6.528678  | -1.361512 | -0.908972 |
| 24 | 1 | 0 | 6.680819  | -0.607248 | 0.695962  |
| 25 | 1 | 0 | 6.628121  | 1.174254  | -0.944524 |
| 26 | 1 | 0 | 5.185287  | 0.515602  | -1.744724 |

-----

|             |        |         |         |         |         |
|-------------|--------|---------|---------|---------|---------|
| Mode        | 1      | 2       | 3       | 4       | 5       |
| Symmetry    | A      | A       | A       | A       | A       |
| Frequencies | 6.4364 | 35.8582 | 47.2007 | 47.3264 | 50.2707 |

### Theoretical calculations on the radical cation of BEDT-TTF-sulfoxide $2^{+\bullet}$ .

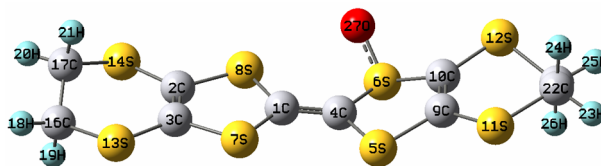

Fig. S14 Optimized geometry for  $2^{+\bullet}$ .

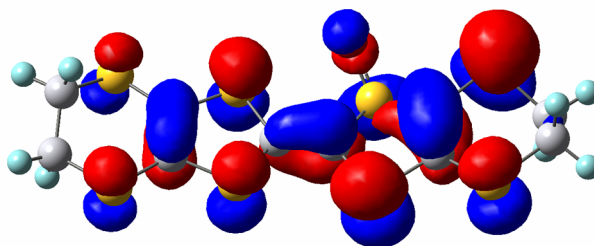

Fig. S15 SOMO of  $2^{+\bullet}$ .

### Orientation for $2^{+\bullet}$ .

| Center Number | Atomic Number | Atomic Type | Coordinates (Angstroms) |           |           |
|---------------|---------------|-------------|-------------------------|-----------|-----------|
|               |               |             | X                       | Y         | Z         |
| 1             | 6             | 0           | -0.718612               | -0.110005 | -0.233157 |
| 2             | 6             | 0           | -3.215638               | 0.616461  | -0.047377 |
| 3             | 6             | 0           | -3.244698               | -0.761166 | -0.001024 |
| 4             | 6             | 0           | 0.645494                | -0.158269 | -0.389843 |
| 5             | 16            | 0           | 1.606616                | -1.604792 | -0.448994 |
| 6             | 16            | 0           | 1.625967                | 1.362960  | -0.600014 |
| 7             | 16            | 0           | -1.685458               | -1.563970 | -0.075969 |
| 8             | 16            | 0           | -1.640943               | 1.382481  | -0.130979 |
| 9             | 6             | 0           | 3.136979                | -0.791899 | 0.013959  |
| 10            | 6             | 0           | 3.129153                | 0.563454  | 0.059758  |
| 11            | 16            | 0           | 4.457243                | -1.910147 | 0.296868  |
| 12            | 16            | 0           | 4.483023                | 1.627802  | 0.374212  |
| 13            | 16            | 0           | -4.621954               | -1.838049 | 0.137003  |
| 14            | 16            | 0           | -4.580985               | 1.720641  | -0.000968 |
| 15            | 6             | 0           | 5.835145                | 0.530081  | -0.222926 |
| 16            | 6             | 0           | -6.039547               | -0.675474 | -0.031031 |
| 17            | 6             | 0           | -5.859647               | 0.627610  | 0.736218  |
| 18            | 1             | 0           | -6.880171               | -1.242147 | 0.383224  |
| 19            | 1             | 0           | -6.230966               | -0.495756 | -1.091453 |
| 20            | 1             | 0           | -6.777484               | 1.221287  | 0.673535  |
| 21            | 1             | 0           | -5.630711               | 0.456211  | 1.791104  |

|             |         |         |          |           |           |
|-------------|---------|---------|----------|-----------|-----------|
| 22          | 6       | 0       | 5.907006 | -0.786177 | 0.540341  |
| 23          | 1       | 0       | 6.756101 | -1.379667 | 0.184513  |
| 24          | 1       | 0       | 6.026251 | -0.613065 | 1.611656  |
| 25          | 1       | 0       | 6.753323 | 1.098622  | -0.043674 |
| 26          | 1       | 0       | 5.726496 | 0.377203  | -1.299896 |
| 27          | 8       | 0       | 1.063402 | 2.427351  | 0.302866  |
| Mode        | 1       | 2       | 3        | 4         | 5         |
| Symmetry    | A       | A       | A        | A         | A         |
| Frequencies | 20.4720 | 31.2482 | 37.1278  | 43.3038   | 54.8976   |

**Electrochemical studies.** Cyclic voltammetry measurements were performed using a three-electrode cell equipped with a platinum millielectrode of 0.126 cm<sup>2</sup> area, an Ag/Ag<sup>+</sup> pseudo-reference and a platinum wire counter-electrode. The potential values were then re-adjusted with respect to the saturated calomel electrode (SCE). The electrolytic media involved a 0.1 mol.L<sup>-1</sup> solution of (*n*-Bu<sub>4</sub>N)PF<sub>6</sub> in MeCN. All experiments have been performed at room temperature at 0.1 V.s<sup>-1</sup>. Experiments have been carried out with an EGG PAR 273A potentiostat with positive feedback compensation.
